# Supplementary material
Source: MDPI journal article supplement (https://www.mdpi.com/2073-4441/13/9/1224)
Supplement: s1 [file s1]

# Multi-Spatial Resolution Rainfall-Runoff Modelling – A Case Study of Sabari River Basin, India

## SI1. Methods used in the HEC-HMS model to simulate hydrological processes

### SI1.1 Excess Rainfall

Excess rainfall estimates by soil conservation service (SCS) – curve number (CN) method is a function of land use and land cover, soil cover, cumulative precipitation and antecedent moisture. Initial losses during the rainfall is a function of maximum potential retention.

$$R_e = \frac{(P-I_a)^2}{(P-I_a+S)} \quad (\text{SE1})$$

where;

$$S = \frac{25400}{\text{CN}} - 254 \quad (\text{SE2})$$

where;  $R_e$  is effective rainfall in mm,  $P$  is the cumulative precipitation in mm,  $S$  is the potential maximum retention in mm,  $\text{CN}$  is curve number, ranges from 30 to 100 and  $I_a$  is considered as 30 % of  $S$ .

### SI1.2 Direct Runoff

#### SI1.2.1 Clark's Unit Hydrograph method

Transformation of excess rainfall to runoff derived by two methods; translation and attenuation. The translation is the movement of excess rainfall through the watershed area to the outlet without any attenuation but with a delay. Attenuation is the reduction of the magnitude of the discharge due to storage of excess rainfall throughout the watershed.

Translation of excess is implicitly determined by a time-area histogram. The ratio between the drainage area contributed at time  $t$  to the total watershed area is a function of time of concentration,  $T_c$ . A typical time area histogram built in the HEC-HMS is given below.

$$\frac{A_t}{A} = \begin{cases} 1.414 \left(\frac{t}{T_c}\right)^{1.5}; t \leq \frac{T_c}{2} \\ 1 - 1.414 \left(1 - \frac{t}{T_c}\right)^{1.5}; t \geq \frac{T_c}{2} \end{cases} \quad (\text{SE3})$$

where;  $A_t$  is a cumulative watershed area at time  $t$ ,  $A$  is the area of the watershed,  $T_c$  is the time of concentration of the watershed. From the continuity equation, which is the common representation of storage in the watershed;

$$\frac{dS}{dt} = I_t - O_t \quad (\text{SE4})$$

And storage at time  $t$  is a function of outflow;

$$S = RO_t \quad (\text{SE5})$$

Where  $\frac{dS}{dt}$  is the change in the reservoir storage with time  $t$ ,  $I_t$  and  $O_t$  are the inflow and outflow at time  $t$  in the reservoir.  $R$  is a constant linear reservoir parameter or storage coefficient. However, the storage cannot be the same at every point of watershed and outflow is always depends on the storage. By solving Eq. (S4) and (S5) using finite difference approximation;

$$O_t = C_A I_t + C_B O_{t-1} \quad (\text{SE6})$$

where  $O_t$  is outflow at time  $t$ ,  $C_A$  and  $C_B$  are routing coefficients

$$C_A = \frac{\Delta t}{R + 0.5\Delta t} \quad (\text{SE7})$$

$$C_B = 1 - C_A \quad (\text{SE8})$$

$$\bar{O}_t = \frac{O_{t-1} + O_t}{2} \quad (\text{SE9})$$

Where  $\bar{O}_t$  is the average outflow at time  $t$ .

### SI1.3 Baseflow

The HEC-HMS uses the exponential baseflow method to model the baseflow at any time during the event by an initial baseflow value. The initial baseflow is the initial condition of the model, which is expressed as a flow rate (m<sup>3</sup>/s) or flow per unit area (m<sup>3</sup>/s/km<sup>2</sup>). Flow per unit area can be useful when there are no initial flow values available or when the initial baseflow to be mentioned for an ungauged basin. An exponential decay constant,  $k$  is the ration between the baseflow of the present and previous time step.

$$Q_t = Q_0 k^t \quad (\text{SE13})$$

Where  $Q_t$  is the baseflow at time  $t$  (days),  $Q_0$  is the baseflow at initial step and  $k$  is an exponential decay constant or recession constant.

The HEC-HMS model requires three parameters to estimate the baseflow;  $Q_0$ ,  $k$  and ratio to peak ( $R_p$ ).  $Q_0$  is mentioned as above in either way by flow rate or flow per square kilometer. Recession constant,  $k$  may be estimated by several methods from [2] and [3] and ratio to the peak is the threshold as a ratio to the computed peak flow (if the computed peak flow is 1000 m<sup>3</sup>/s and  $R_p$  is 0.1 then threshold is 100 m<sup>3</sup>/s).

#### SI1.4 Channel flow

Muskingum routing is one of the popular methods used to model the channel flow by estimating the storage from the continuity equation. Storage represented at each time step as the sum of the wedge and prism storages. The equation for the storage and outflow at time  $t$  is given as;

$$S_t = K[XI_t + (1 - X)O_t] \quad (\text{SE14})$$

where;

$$O_t = \left( \frac{\Delta t - 2KX}{2K(1-X) + \Delta t} \right) I_t + \left( \frac{\Delta t + 2KX}{2K(1-X) + \Delta t} \right) I_{t-1} + \left( \frac{2K(1-X) - \Delta t}{2K(1-X) + \Delta t} \right) O_{t-1} \quad (\text{SE15})$$

where;  $S_t$  is the computed storage at time  $t$ ,  $K$  is the travel time of the flood wave in the reach;  $X$  is weighing factor to inflow and outflow ( $0 \leq X \leq 0.5$ ),  $I_t$  and  $O_t$  are the inflow and outflow at time  $t$  and  $\Delta t$  is the length of the computational interval.

$$K = \frac{L}{V_W} \quad (\text{SE16})$$

where  $L$  is the channel length (km) and  $V_W$  is the flood wave velocity.

$$V_W = \frac{1}{B} \frac{dQ}{dy} \quad (\text{SE17})$$

where  $B$  is the top width of the water surface (m),  $\frac{dQ}{dy}$  is the slope of the rating curve at the known cross section. HEC-HMS technical manual suggests that the flood wave velocity normally 1.33 to 1.67 times the average velocity, which can be computed by Manning's equation.

$$X = \frac{1}{2} \left( 1 - \frac{Q_0}{BS_0 V_W \Delta x} \right) \quad (\text{SE18})$$

where;  $Q_0$  is the reference flow from the inflow hydrograph, an average flow, midway between the baseflow and peak flow[4],  $S_0$  is the friction or bed slope,  $V_W$  is the flood wave celerity (m/s) and  $\Delta x$  is the length of the reach. HEC-HMS requires  $K$  and  $X$ , estimated from the above methods.

The HEC-HMS model solves the above mentioned equations and calibrates parameters provided input data including observed streamflow.

*SI2. Parameters with respect to sub-basin area*

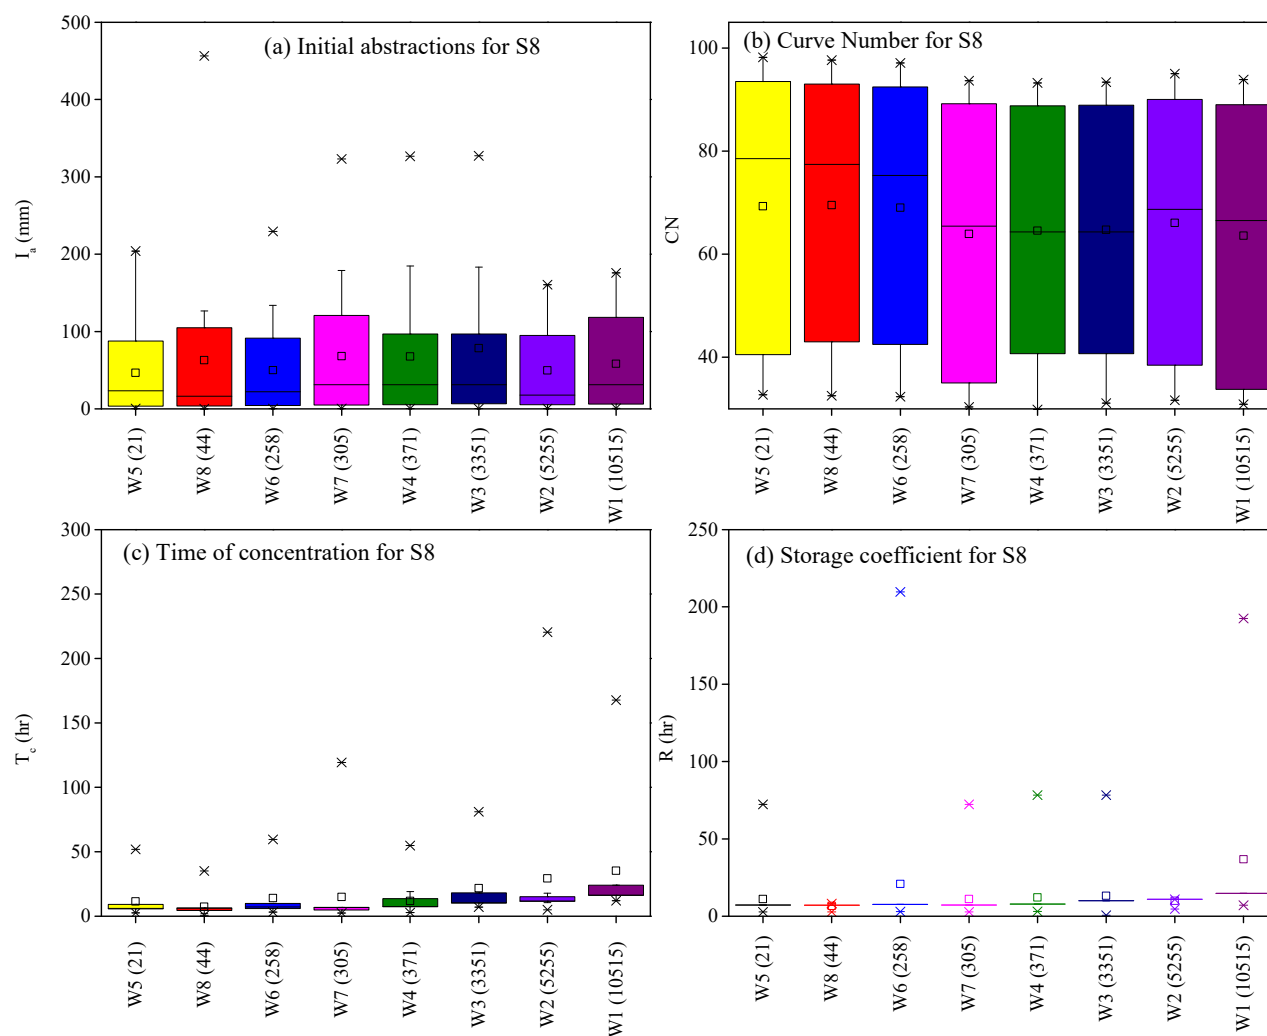

**Figure SI1.** Boxplots of the calibrated parameter for 15 events of S8 configuration with respect to the sub-basin area. Each panel corresponds to a parameter, and panels in the clockwise direction from top left correspond  $I_a$  (a), CN (b),  $T_c$  (c) and R (d). Area in  $\text{km}^2$  is mentioned in the brackets of X-axis labels.

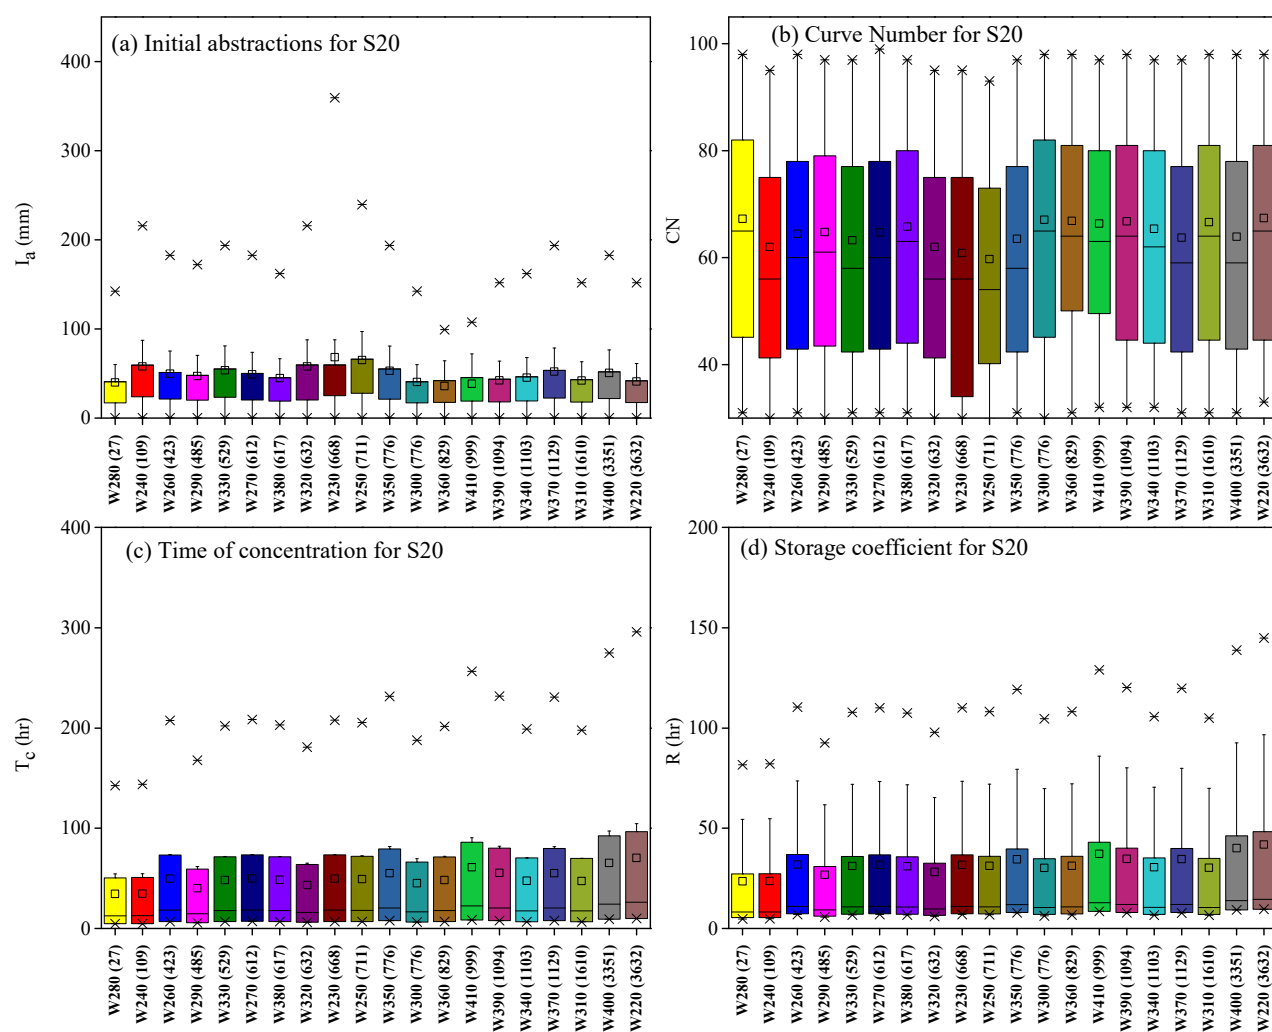

**Figure S12.** Boxplots of the calibrated parameter for 15 events of S20 configuration with respect to the sub-basin area. Each panel corresponds to a parameter, and panels in the clockwise direction from top left correspond to  $I_a$ , CN,  $T_c$  and R. Area in  $\text{km}^2$  is mentioned in the brackets of X-axis labels.

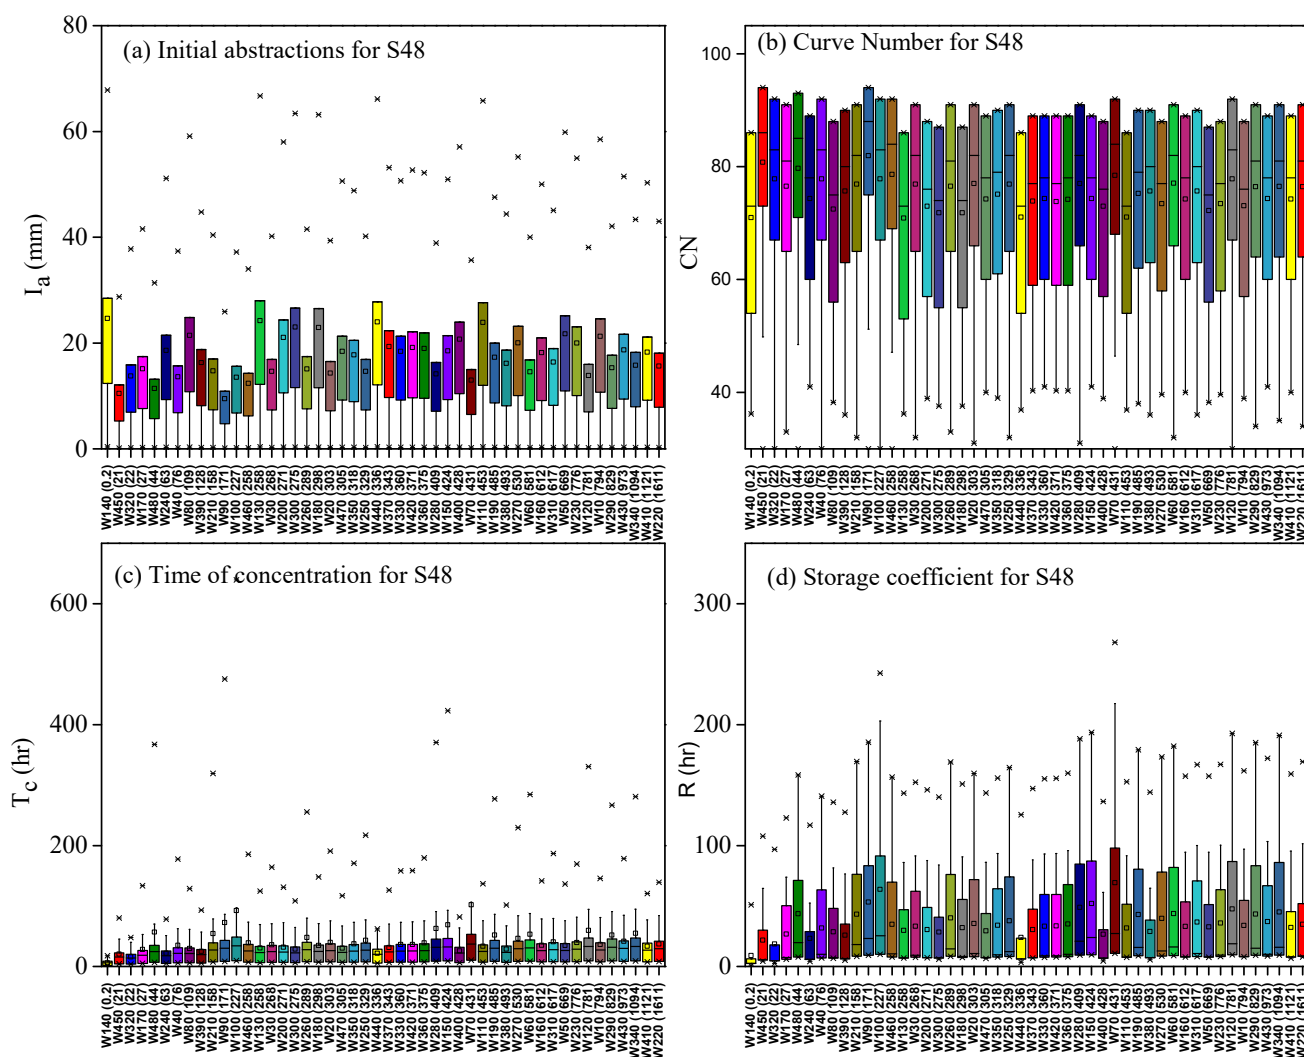

**Figure SI3.** Boxplots of the calibrated parameter for 15 events of S48 configuration with respect to the sub-basin area. Each panel corresponds to a parameter, and panels in the clockwise direction from top left correspond  $I_a$ , CN,  $T_c$  and R. Area in km<sup>2</sup> is mentioned in the brackets of X-axis labels.

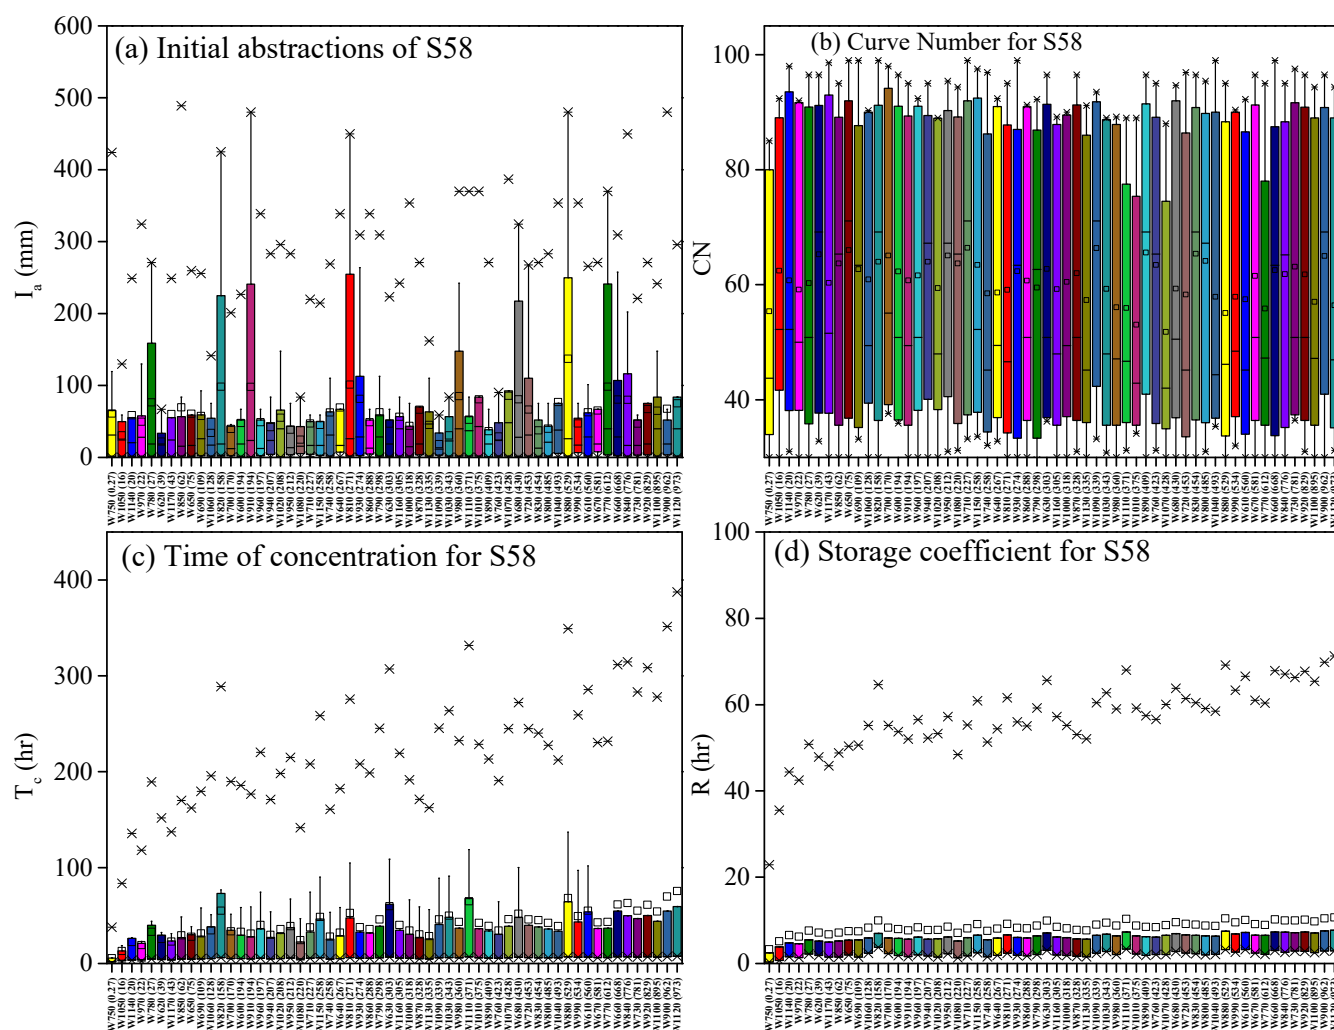

**Figure S14.** Boxplots of the calibrated parameter for 15 events of S58 configuration with respect to the sub-basin area. Each panel corresponds to a parameter, and panels in the clockwise direction from top left correspond  $I_a$ , CN,  $T_c$  and R. Area in km<sup>2</sup> is mentioned in the brackets of X-axis labels.

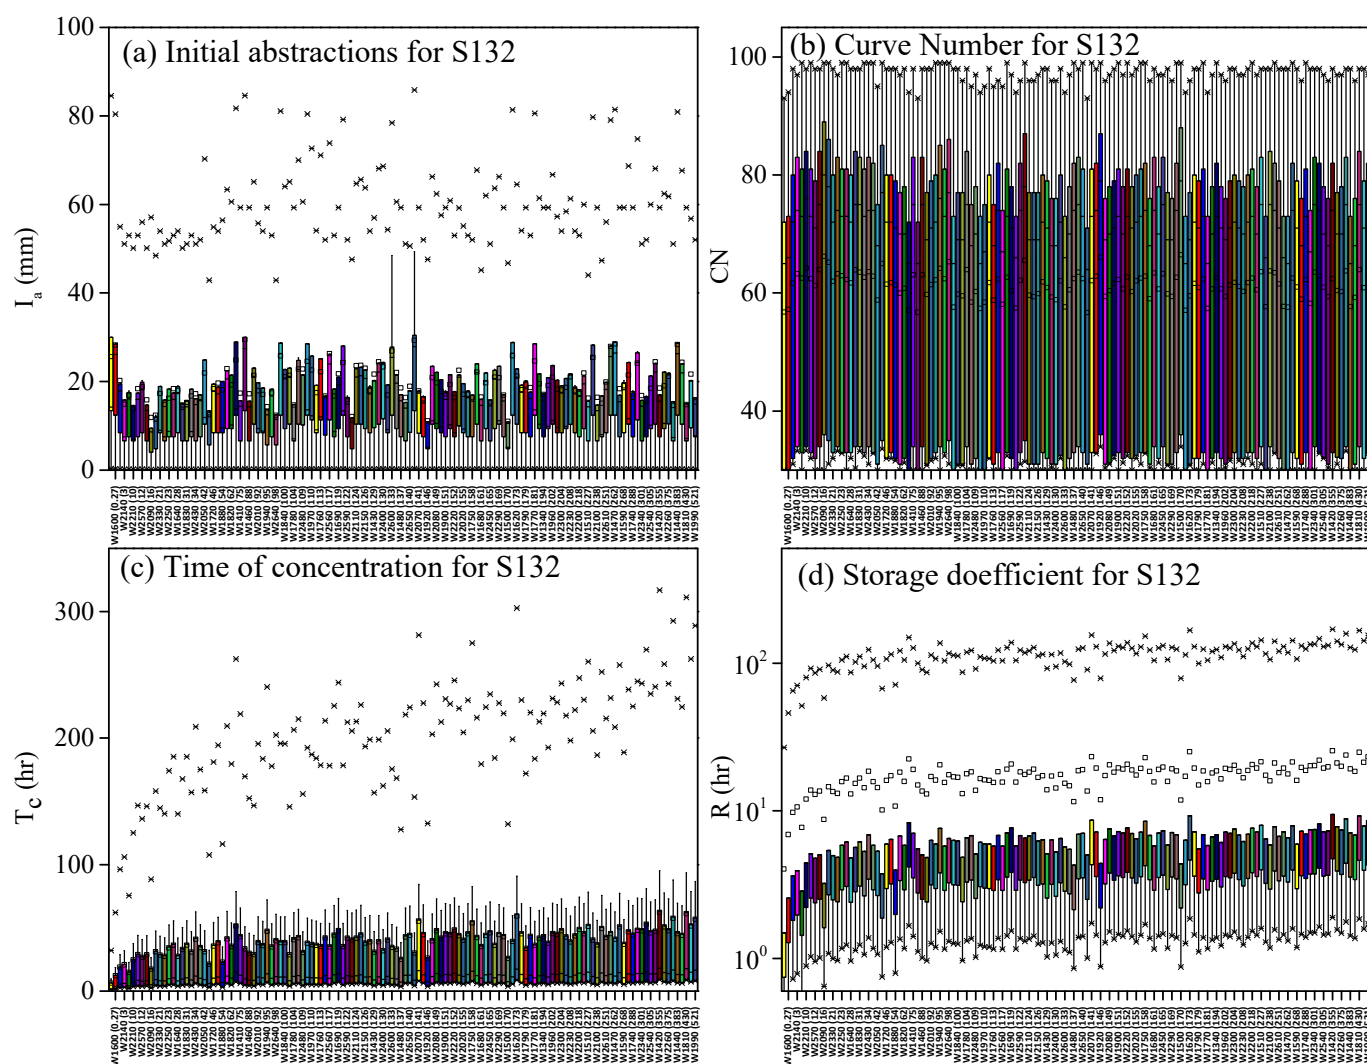

**Figure SI5.** Boxplots of the calibrated parameter for 15 events of S132 configuration with respect to the sub-basin area. Each panel corresponds to a parameter, and panels in the clockwise direction from top left correspond  $I_a$ , CN,  $T_c$  and R. Area in  $\text{km}^2$  is mentioned in the brackets of X-axis labels.



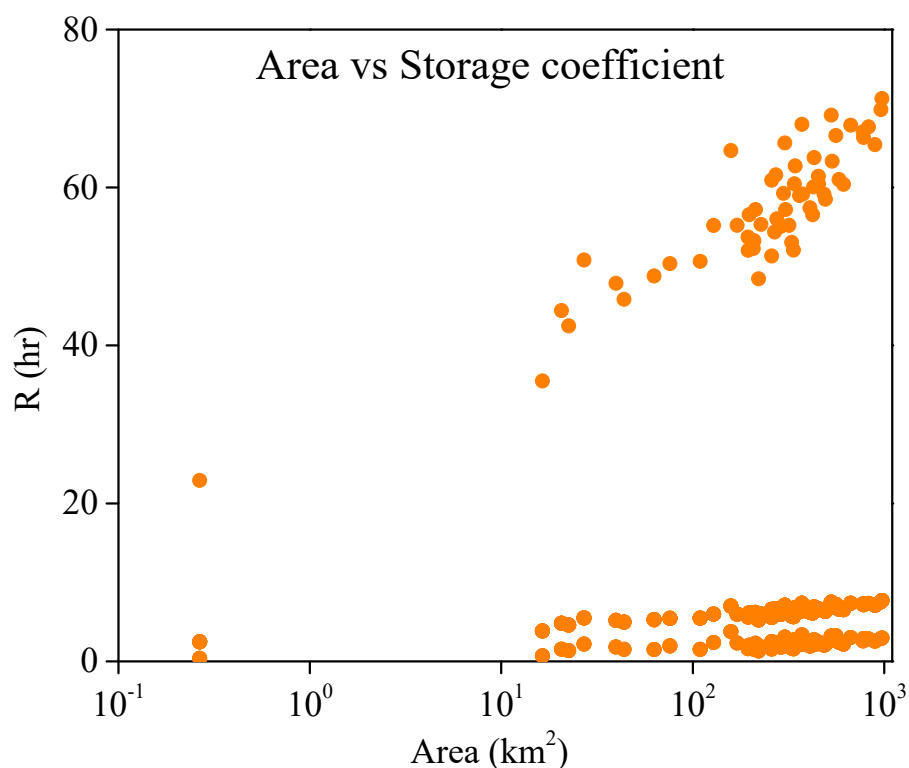

**Figure SI6.** Storage coefficient (R) with respect to the area for S58 configuration. The X-axis is on logarithmic scale and plot suggests an exponential increase in the R values

## References

1. Yoo, C.; Lee, J.; Cho, E. Theoretical evaluation of concentration time and storage coefficient with their application to major dam basins in Korea. *Water Sci. Technol. Water Supply* **2019**, *19*, 644–652, doi:10.2166/ws.2018.156.
2. Tallaksen, L.M. A review of baseflow recession analysis. *J. Hydrol.* **1995**, *165*, 349–370, doi:10.1016/0022-1694(94)02540-R.
3. Tallaksen, L.M.L.M.; Van Lanen H.A.J.; Van Lanen, H.A.J.; Van Lanen H.A.J. Hydrological Drought: Processes and Estimation Methods for Streamflow and Groundwater Developments in Water science. *Elsevier* **2004**, *48*, 579, doi:10.1016/0022-1694(94)02540-R.
4. Brunner, G.W.; Gorbrecht, J. A Muskingum-Cunge Channel Flow Routing Method for Drainage Networks. *ASCE J. Hydraul.* **1991**, *117*, 629–642.
